# Supplementary material
Source: HighWire-hosted journal article supplement (https://jmg.bmj.com/content/54/4/224)
Supplement: inline-supplementary-material-3 [file inline-supplementary-material-3.pdf]

Supplemental Table 2: Synopsis of CF phenotypic expression in patients bearing different CFTR genotypes. CFTR-RD: CFTR related disorders; PS: pancreatic sufficiency; PI: pancreatic insufficiency

| <b>CFTR genotype</b>                                    | <b>N</b> | <b>Phenotypic expression</b>           |
|---------------------------------------------------------|----------|----------------------------------------|
| p.[Arg74Trp;Val201Met;Asp1270Asn];[class I-II mutation] | 5        | CF with PS (4 cases); CFTR-RD (1 case) |
| p.[Arg74Trp;Val201Met;Asp1270Asn];[class IV-V mutation] | 3        | CFTR-RD (3 cases)                      |
| p.[Arg74Trp;Asp1270Asn];[class IV-V mutation]           | 1        | CFTR-RD                                |
| p.[Arg74Trp;Asp1270Asn];[class I-II mutation]           | 1        | Healthy                                |
| p.[Asp1270Asn];[class I-II mutation]                    | 2        | Healthy (2 cases)                      |
| p.[Ile148Thr;Ile1023_Val1024del];[class I-II mutation]  | 5        | CF with PI (5 cases)                   |
| p.[Ile148Thr];[class I-II mutation]                     | 4        | Healthy (4 cases)                      |

|                                                             |    |                                       |
|-------------------------------------------------------------|----|---------------------------------------|
| p.[Arg117Leu;Leu997Phe];p.[Arg117Leu;Leu997Phe]             | 2  | CF with PS (1 case); CFTR-RD (1 case) |
| p.[Arg117Leu;Leu997Phe];[class I-II mutation]               | 4  | CF with PS (4 cases)                  |
| p.[Leu997Phe];[p.Leu997Phe]                                 | 2  | CFTR-RD (1 case); healthy (1 case)    |
| p.[Leu997Phe];[class I-II mutation]                         | 16 | CFTR-RD (8 cases); healthy (8 cases)  |
| p.[Leu997Phe];[class IV-V mutation]                         | 16 | CFTR-RD (6 cases); healthy (10 cases) |
| c.[1210-34TG[12];1210-12T[5];2930C>T];[class I-II mutation] | 3  | CF (1 case); CFTR-RD (2 cases)        |
